# Supplementary material for: Tyrosine phosphorylation activates 6-phosphogluconate dehydrogenase and promotes tumor growth and radiation resistance
Source: Nat Commun. 2019 Mar 1;10:991. doi: 10.1038/s41467-019-08921-8 (PMC6397164; doi:10.1038/s41467-019-08921-8)
Supplement: Supplementary file 1 — Supplementary Information [file 41467_2019_8921_MOESM1_ESM.pdf]

## **Supplementary Information**

**Tyrosine phosphorylation activates 6-phosphogluconate dehydrogenase and promotes tumor growth and radiation resistance**

**Liu et al.**

Supplementary Fig. 1

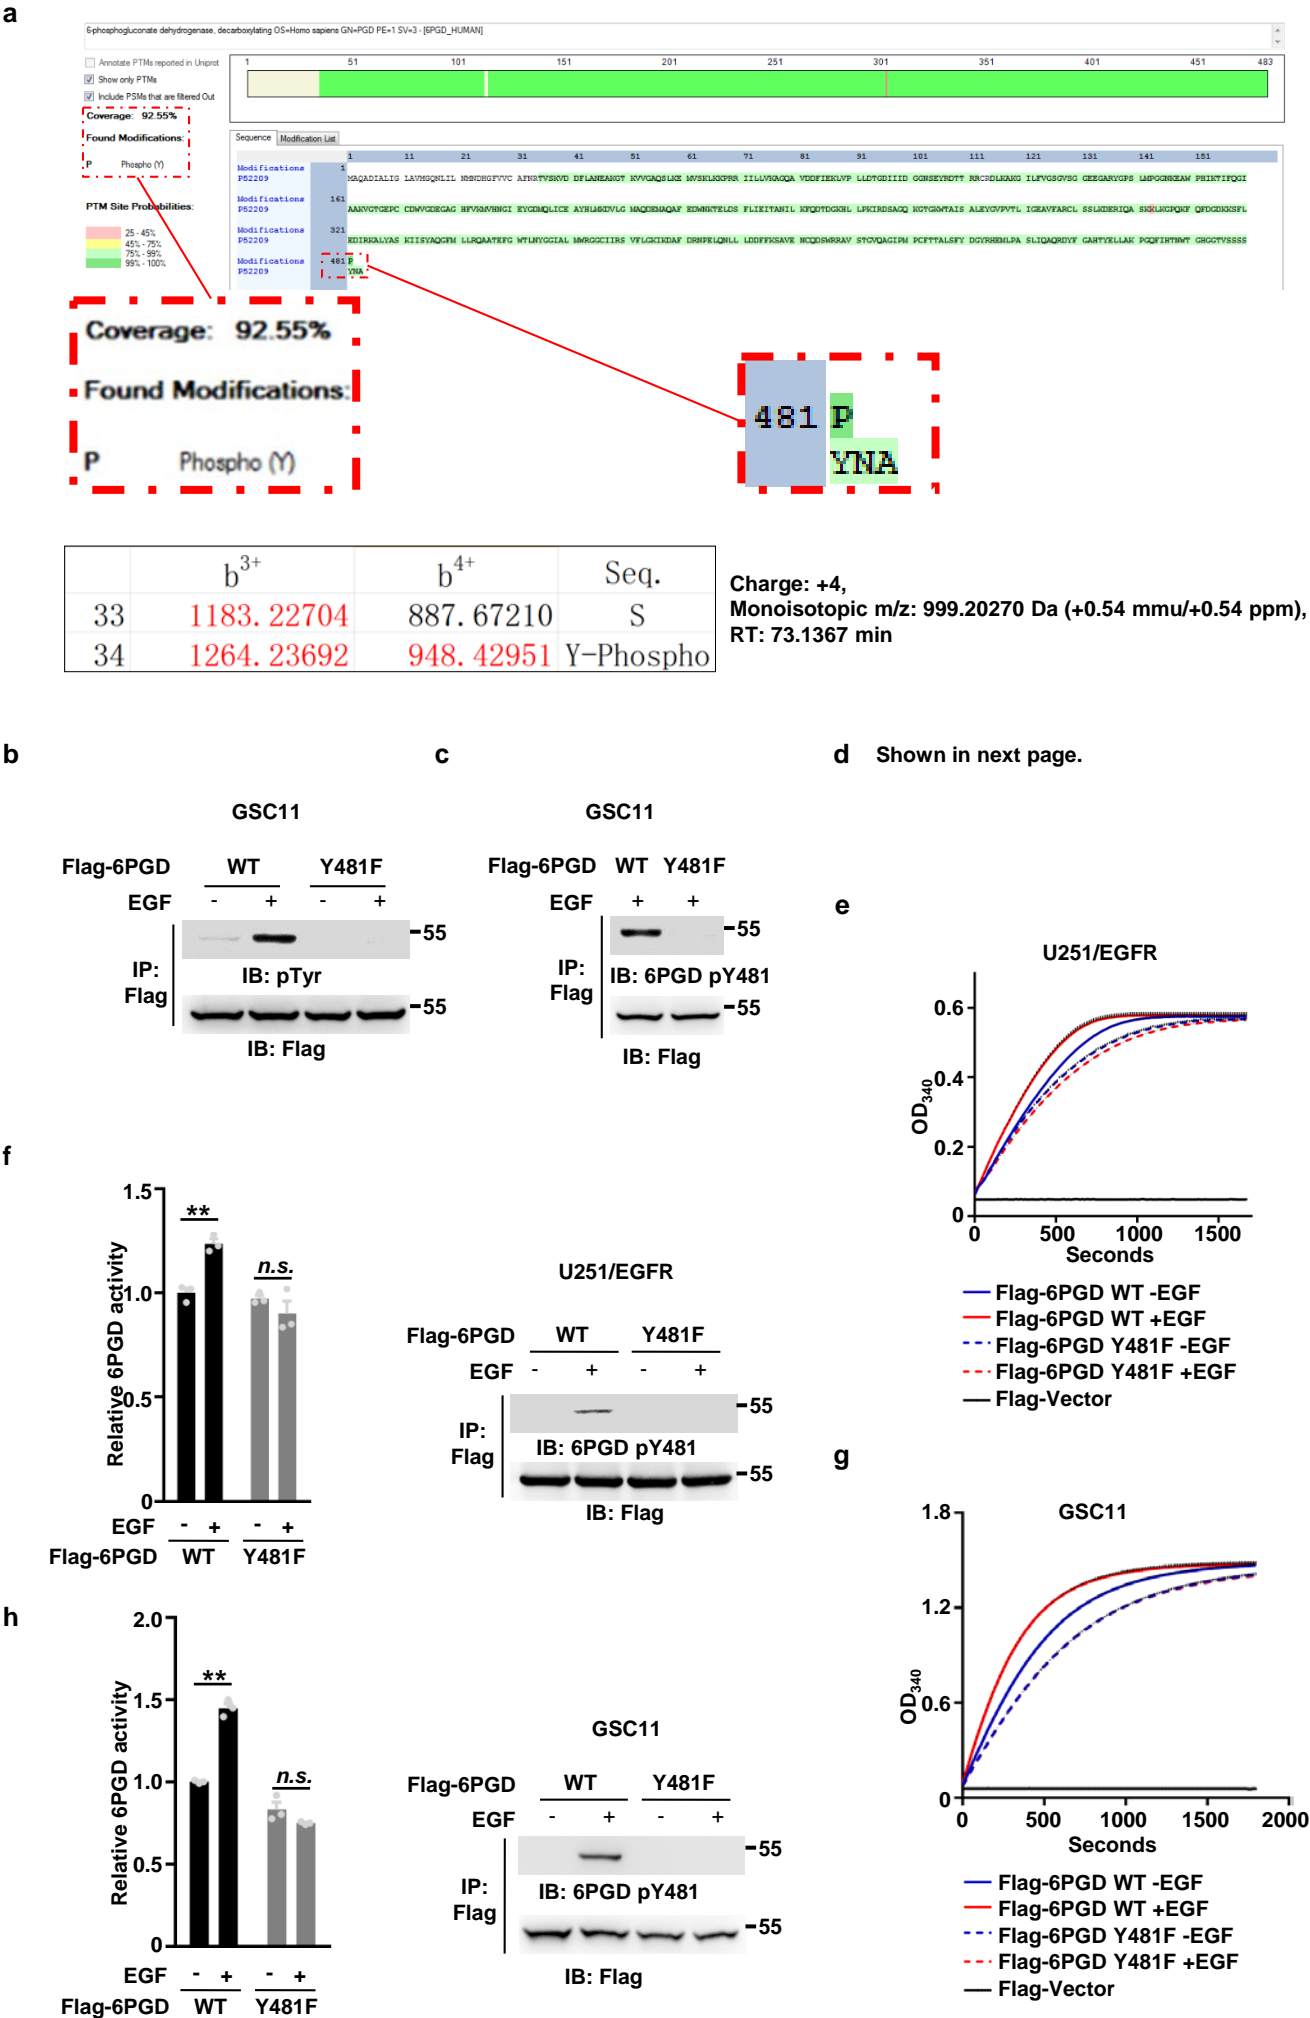

**d**

CLUSTAL 0(1.2.4) multiple sequence alignment

|                           |                                                                       |     |
|---------------------------|-----------------------------------------------------------------------|-----|
| Human                     | QSLKEMVSKLKKPRRIILLVKAGQAVDDFIEKLVPLLDTGDI IIDGGNSEYRDTTTRRCRD        | 115 |
| Rat                       | KSLKDMVSKLKKPRRVILLVKAGQAVDDFIEKLVPLLDTGDI IIDGGNSEYRDTTTRRCQD        | 115 |
| Mouse                     | QSLKDMVSKLKKPRRVILLVKAGQAVDDFIEKLVPLLDTGDI IIDGGNSEYRDTTTRRCRD        | 115 |
| Sheep                     | HSLEEMVSKLKKPRRIILLVKAGQAVDNFIEKLVPLLDIGDI IIDGGNSEYRDTMRRCRD         | 115 |
| Bovine                    | HSLEEMASKLKKPRRIILLVKAGQAVDDFIEKLVPLLDIGDI IIDGGNSEYRDTMRRCRD         | 115 |
| Dog                       | HSLEEMVSKLKKPRRIILLVKAGQAVDDFIGLVPLNTGDII IIDGGNSEYRDTTTRRCRD         | 115 |
| Pig                       | RSLEEMVSMLKKPRRIILLVKAGQAVDDFIEKLVPLLDTGDI IIDGGNSEYRDTTTRRCRD        | 115 |
| Giant_panda               | HSLEEMVSKLKTPrRIILLVKAGQAVDDFIDRLVPLLDTGDI IIDGGNSEYRDTTTRCRS         | 114 |
| Horse                     | HSLEEMVSKLKKPRRIILLVKAGQAVDDFIEKLVPLLDTGDI IIDGGNSEYRDTTTRRCRD        | 113 |
| Atlantic_salmon           | ESLEDMAVLKKPRRIVMLVKAGQAVDDFIDKLVPLEAGDI IIDGGNSEYRDTTTRCKS           | 115 |
| Osmerus_mordax            | ESLEDMVSKLKKPRRIILLVKAGQAVDDFIDKLVPLEAGDI IIDGGNSEYRDTTTRCQS          | 115 |
| Black_porgy               | ESLEDMVSKLKKPRRIILLVKAGQAVDDFIDKLVPLEAGDI IIDGGNSEYRDTTTRCQS          | 115 |
| Anthurium_amnicola        | HSIEDLAKKLKTPRKIMLLVKAGSAVDDFIEQIIPHLEKGDI IIDGGNSHPDITIRCKY          | 117 |
| Chlamydomonas_reinhardtii | EQVKDFVQSLQRPRRVIILVKAGAPVDQTIDQLCEFMPEGDI IIDGGNEWENTEKMAK           | 118 |
| Zebrafish                 | ESLEDMVSKLKKPRRIILLVKAGQAVDDFIDKLVPLEPGDI IIDGGNSEYRDTTTRCKS          | 115 |
| Caenorhabditis_elegans    | HSIEEMCKKLKRPRRVMLLIKAGTPVMDMIDAIVPHLEEEDI IIDGGNSEYTDSNNRSEQ         | 115 |
| Drosophila_melanogaster   | DSLEEVSKLSKSPKVMMLLKAGSAVDFFIQGLVPLLSAGDVI IIDGGNSEYQDTSRRCD          | 116 |
| Yeast                     | TSIEDLVAKLKKPRKIMLLIKAGAPVDTLIKELVPHLDKGI IIDGGNSHPDITNRRYE           | 117 |
|                           | : : : : * : * : * : * : * : * : * : : : * : * : * : * : * : * : * : * |     |

|                           |                                                               |     |
|---------------------------|---------------------------------------------------------------|-----|
| Human                     | LKAKGILFVSGSVSGGEEGARYGPSLMPGGNKEAWPHIKTIFQGIAAKVGTGEPCCDWV-  | 174 |
| Rat                       | LKAKGILFVSGSVSGGEEGARYGPSLMPGGNKEAWPHIKTIFQAI AAKVGTGEPCCDWV- | 174 |
| Mouse                     | LKAKGILFVSGSVSGGEEGARYGPSLMPGGNKEAWPHIKAIFQAI AAKVGTGEPCCDWV- | 174 |
| Sheep                     | LKDKGILFVSGSVSGGEDGARYGPSLMPGGNKEAWPHIKAIFQIAAKVGTGEPCCDWV-   | 174 |
| Bovine                    | LKEKGILFVSGSVSGGEDGARYGPSLMPGGNKEAWPHIKAIFQIAAKVGTGEPCCDWV-   | 174 |
| Dog                       | LKAKGILFVSGSVSGGEEGARYGPSLMPGGDKEAWPHIKTIFQIAAKVSGEPCCDWV-    | 174 |
| Pig                       | LKAKGILFVSGSVSGGEEGARYGPSLMPGGNREAWPHLKEIFQSI AAKVGTGEPCCDWV- | 174 |
| Giant_panda               | LKAKGILFVSGSVSGGEEGARYGPSLMPGGDKEAWPHIKTIFQIAAKVGTGEPCCDWV-   | 173 |
| Horse                     | LKAKGILFVSGSVSGGEEGARHGPSLMPGGNKEAWPHIKTIFQIAAKVGTGEPCCDWAK   | 173 |
| Atlantic_salmon           | LKEKNLLFVSGSVSGGEEGARYGPSLMPGGHKEAWPHIKEIFQSI AAKVGTGEPCCDWV- | 174 |
| Osmerus_mordax            | MKDKLLFVSGSVSGGEEGARYGPSLMPGGHKEAWPHIKDIFQSI AAKVGTGEACCDWV-  | 174 |
| Black_porgy               | LKAKGLLFVSGSVSGGEEGARYGPSLMPGGHIEAWPHIKDIFQSI AAKVGTGEPCCDWV- | 174 |
| Anthurium_amnicola        | LEEKGLFLIGCGVSGGEDGARYGPSLMPGGSKAWEHVKPIFQSI SIAK-VKDEPCEEWV- | 175 |
| Chlamydomonas_reinhardtii | VAAKGILYMGCMVSGGEEGARRGPSMMPGGSPEAYSHIKSVVEKVAQA-VDDGPCVMI-   | 176 |
| Zebrafish                 | LKEKNLLFVSGSVSGGEDGARYGPSLMPGGHKDAWPHLKDIFQSI AAKVGTGEPCCDWV- | 174 |
| Caenorhabditis_elegans    | LAAGIMFVGCVGSGGEEGARFGPSLMPGGNPKAWPHLKDIFQKIAAK-SNGEPCCDWV-   | 173 |
| Drosophila_melanogaster   | LAKLGLLFVSGSVSGGEEGARHGPSLMPGGHEAAWPLIQIPFQAI CAK-ADGEPCEEWV- | 174 |
| Yeast                     | LTKQGILFVSGSVSGGEDGARFGPSLMPGGSAAWPHIKNIFQSI AAK-SNGEPCEEWV-  | 175 |
|                           | . ***** * . ***** * . ***** * . ***** *                       |     |

# Supplementary Fig.1 (continued)

d (continued)

|                           |                                                              |     |
|---------------------------|--------------------------------------------------------------|-----|
| Human                     | -GDEGAGHFVKMVHNGIEYGDMLICEAYHLMKDVLGMAQDEMAQAFEDWNKTELDSFLI  | 233 |
| Rat                       | -GDEGAGHFVKMVHNGIEYGDMLICEAYHLMKDVLGMRHEEMAQAFEDWNKTELDSFLI  | 233 |
| Mouse                     | -GDEGAGHFVKMVHNGIEYGDMLICEAYHLMKDVLGMRHEEMAQAFEEWNKTELDSFLI  | 233 |
| Sheep                     | -GDDGAGHFVKMVHNGIEYGDMLICEAYHLMKDVLGLGHKEMAKAFEEWNKTELDSFLI  | 233 |
| Bovine                    | -GDEGAGHFVKMVHNGIEYGDMLICEAYHLMRDVLCMGHAEMAKAFEEWNKTELDSFLI  | 233 |
| Dog                       | -GDEGAGHFVKMVHNGIEYGDMLICEAYHLMRDVLCMEHNGMAEAFEEWNKTELDSFLI  | 233 |
| Pig                       | -GDEGAGHFVKMVHNGIEYGDMLICEAYHLMKDVLGMEQHEMAKAFEEWNKTELDSFLI  | 233 |
| Giant_panda               | -GDEGAGHFVKMVHNGIEYGDMLICEAYHLMRDVLCMGHDEMAKVFEWNKTELDSFLI   | 232 |
| Horse                     | VGSEGAGHFVKMVHNGIEYGDMLICEAYHLMKDVLGMEHNEMAKAFEEWNKTELDSFLI  | 233 |
| Atlantic_salmon           | -GDEGAGHFVKMVHNGIEYGDMLICEAYHLMKDVLGMDHDEMAQAFEDWNKTELDSFLI  | 233 |
| Osmerus_mordax            | -GDEGAGHFVKMVHNGIEYGDMLICEAYHLMKDVLGMDHDEMAKAFNEWNKTELDSFLI  | 233 |
| Black_porgy               | -GDEGAGHFVKMVHNGIEYGDMLICEAYHLMKDVLGMDHDEMAQAFDKWNKTELDSFLI  | 233 |
| Anthurium_amnicola        | -GETGAGHYVKMVHNGIEYGDMLICEAYHLMKEGLDLTHDEIGDVFESWNKEELDSFLI  | 234 |
| Chlamydomonas_reinhardtii | -GGGAGNFVKMVHNGIEYGDMLISEAYDLKTLGGLNNEELAAVFKEWDAELKSFLV     | 235 |
| Zebrafish                 | -GDEGAGHFVKMVHNGIEYGDMLICEAYHLMKDVLGMDHDEMAQVFEQWNKTELDSFLI  | 233 |
| Caenorhabditis_elegans    | -GNAGSGHFVKMVHNGIEYGDMLIAEAYHLLSKAVELNHDQMAEVLDDWNKGELESFLI  | 232 |
| Drosophila_melanogaster   | -GDGGAGHFVKMVHNGIEYGDMLICEAYHIMKS-LGLSADQMADEFGKWSAELDSFLI   | 232 |
| Yeast                     | -GPAGSGHYVKMVHNGIEYGDMLICEAYDIMKRIGRFTDKEISEVDFKWTGVLDLDSFLI | 234 |
|                           | * *: : ***** , ** , : : : , ** * , ** :                      |     |
| Human                     | EITANILKFQDT-DGKHLLPKIRDSAGQKGTGKWTASALEYGPVTLIGEAVFARCLSS   | 292 |
| Rat                       | EITANILKFQDT-DGKELLPKIRDSAGQKGTGKWTASALEYGPVTLIGEAVFARCLSS   | 292 |
| Mouse                     | EITANILKYRDT-DGKELLPKIRDSAGQKGTGKWTASALEYGPVTLIGEAVFARCLSS   | 292 |
| Sheep                     | EITASILKFQDA-DGKHLLPKIRDSAGQKGTGKWTASALEYGPVTLIGEAVFARCLSS   | 292 |
| Bovine                    | EITANILKFQDA-DGKHLLPKIRDSAGQKGTGKWTASALEYGPVTLIGEAVFARCLSS   | 292 |
| Dog                       | EITANILKFRDS-DGQHLLPKIRDSAGQKGTGKWTASALEYGPVTLIGEAVFARCLSS   | 292 |
| Pig                       | EITANILKFQDA-DGKHLLPKIRDSAGQKGTGKWTASALEYGPVTLIGEAVFARCLSS   | 292 |
| Giant_panda               | EITANILKFQDS-DGKHLLPKIRDSAGQKGTGKWTASALEYGPVTLIGEAVFARCLSS   | 291 |
| Horse                     | EITANILKFQDT-DGKYLLPKIRDSAGQKGTGKWTASALEYGPVTLIGEAVFARCLSS   | 292 |
| Atlantic_salmon           | EITAGILKFRDT-DGTHLLPKIRDAAGQKGTGKWTASALEYGPVTLIGEAVFARCLSA   | 292 |
| Osmerus_mordax            | EITANILKFRDA-DGTHLLPKIRDSAGQKGTGKWTASALEYGPVTLIGEAVFARCLSS   | 292 |
| Black_porgy               | EITANILKYRDS-DGTHLLPKIRDSAGQKGTGKWTASALEYGPVTLIGEAVFARCLSS   | 292 |
| Anthurium_amnicola        | EITKDIMRFKDE-DGKPLVEIKDTAGQKGTGKWTASSLDLGPVTLIGEAVSRTLSS     | 293 |
| Chlamydomonas_reinhardtii | EITAIIVNKKDDQAPGYLDQIVDQTSKGTGKWTQQAAELAVAAPTMASALDARYMSA    | 295 |
| Zebrafish                 | EITANILKFQDA-DGTNLLPKIRDSAGQKGTGKWTASALEYGPVTLIGEAVFARCLSS   | 292 |
| Caenorhabditis_elegans    | EITANILKYRDE-QGEPVPIKIRDSAGQKGTGKWTCAALEYGLPVTLIGEAVFARCLSA  | 291 |
| Drosophila_melanogaster   | EITRDILKYKDG-KG-YLLERIRDTAGQKGTGKWTAAALQYGPVTLIGEAVFSRCLSA   | 290 |
| Yeast                     | EITRDILKFDDV-DGKPLVEIKMDTAGQKGTGKWTAINALDLGMPVTLIGEAVFARCLSA | 293 |
|                           | *** * , * : : * * : * , ***** : : . . : . * : * :            |     |
| Human                     | LKDERIQASKKLGPKQF--QFDGDKKSFLDIRKALYASKIISYAQGFMLLRQAATEFG   | 350 |
| Rat                       | LKEERVQASRKLKGPQMV--QLEGSQAFLDVRKALYASKIISYAQGFMLLRQAATEFG   | 350 |
| Mouse                     | LKEERVQASQKLKGPQV--QLEGSKSFLDIRKALYASKIISYAQGFMLLRQAATEFG    | 350 |
| Sheep                     | LKDERIQASKKLGPKQNI--PFEGDKKSFLDIRKALYASKIISYAQGFMLLRQAATEFG  | 350 |
| Bovine                    | LKDERIQASKKLGPKQV--PFEGDKKSFLDIRKALYASKIISYAQGFMLLRQAATEFG   | 350 |
| Dog                       | LKDERIQASKKLGPKQM--QFEGDKKAFLEDIRKALYASKIISYAQGFMLLRQAATEFG  | 350 |
| Pig                       | LKDERVQASKKLGPKQKI--QFSGDKKSFLDIRKALYASKIISYQGFMLLRQAAAEFG   | 350 |
| Giant_panda               | LKDERIQASKKLGPKQKI--QFEGDKKAFLEDIRKALYASKIISYAQGFMLLRQAATELG | 349 |
| Horse                     | LKDERIQASGKLKGPRI--QFEGDKKSFLDIRKALYASKIISYAQGFMLLRQAATEFG   | 350 |
| Atlantic_salmon           | LKDERVEASRSLAGPQGA--KFNGDKASFLDIRKALYASKIISYAQGFMLLRQAAKEFG  | 350 |
| Osmerus_mordax            | LKEERVEASKSLSGPEGT--KFSGNKSFLDIRKALYASKIISYAQGFMLLRQAAKEFG   | 350 |
| Black_porgy               | LKDERVEASRSLSGPQGV--KFSGDKAEFLDIRKALYASKIISYAQGFMLLRQAAKEFG  | 350 |
| Anthurium_amnicola        | IKDERVRASKILPGPKNK-K-YSGDKKLFVKQLGQALYASKIISYAQGFMLMREAADNN  | 351 |
| Chlamydomonas_reinhardtii | LKSERVAASKSFTSCVTPGPVAGVDKAQLINDVRAALYASKIISYAQGMNIKAKSVEMK  | 355 |
| Zebrafish                 | LKDERVQASKSLSGPQGV--KFTGNKEQFLDIRKALYASKIISYAQGFMLLRQAALEFG  | 350 |
| Caenorhabditis_elegans    | LKDERVRASKQLPRPQVSPDVTVDKRVFIKQISKALYASKIISYAQGFMLLAASKQFN   | 351 |
| Drosophila_melanogaster   | LKDERVQASSVLKGPSTK--AQVANLTKFLDDIKHALYCAKIVSYAQGFMLMREAARENK | 348 |
| Yeast                     | IKDERKRASKLLAGPTVP-KDAIHREQFVYDLEQALYASKIISYAQGFMLIREAARSYG  | 352 |
|                           | : * , ** * : : : : * , * : * : * : : : : .                   |     |

# Supplementary Fig.1 (continued)

d (continued)

|                           |                                                            |     |
|---------------------------|------------------------------------------------------------|-----|
| Human                     | WTLNYGGIALMWRGGCIIRSVFLGKIKDAFDRNPQLNLLDDFFKSAVENCQDSWRRV  | 410 |
| Rat                       | WTLNYGGIALMWRGGCIIRSVFLGKIKDAFERNPELQNLDDFFKSAVDDCQDSWRRVI | 410 |
| Mouse                     | WTLNYGGIALMWRGGCIIRSVFLGKIKDAFERNPELQNLDDFFKSAVDNCQDSWRRVI | 410 |
| Sheep                     | WTLNYGGIALMWRGGCIIRSVFLGKIKDAFDRNPGLQNLDDFFKSAVENCQDSWRRAI | 410 |
| Bovine                    | WTLNYGGIALMWRGGCIIRSVFLGKIKDAFDRNPGLQNLDDFFKSAVENCQDSWRRAI | 410 |
| Dog                       | WTLNYGAIAMWRGGCIIRSVFLGKIKDAFDRNPQLNLLDDFFKSAVENCQDSWRRV   | 410 |
| Pig                       | WSLNYGGIALM-----CVFLGKIKDAFDRNPGLQNLDDFFKSAVEDCQDSWRRV     | 402 |
| Giant_panda               | WTLNYGGVALMWRGGCIIRSVFLGKIKDAFDRNPQLNLLDDFFKSAVEDCQDSWRRV  | 409 |
| Horse                     | WTLNYGGIALMWRGGCIIRSVFLGKIKDAFDRNPELENLLDDFFKSAVESCQDSWRRV | 410 |
| Atlantic_salmon           | WSLNYGAIAMWRGGCIIRSVFLGKIKEAFDRDAELQNLDDFFSNAVQDCQDSWRRV   | 410 |
| Osmerus_mordax            | WSLNYGAIAMWRGGCIIRSVFLGKIKEAFDRDFELQSLDDFFSNAVQDCQDSWRRV   | 410 |
| Black_porgy               | WSLNYGAIAMWRGGCIIRSVFLGKIKEAFDRDAELQNLDDFFSNAVQDCQDSWRRV   | 410 |
| Anthurium_amnicola        | WDLNAGIALMWRGGCIIRSAFLGDIKNAYTNPNLENLLDFPFKKAIDDAQDSWRRV   | 411 |
| Chlamydomonas_reinhardtii | WNVDLGGLARIWKGGCIIRAQFLDRIVAYERNPELPSLLVDPDFAKELTAAEASWRRV | 415 |
| Zebrafish                 | WSLNYGAIAMWRGGCIIRSVFLGKIKEAFDRNPQLSLLDDFFSKAVQDCQDSWRRV   | 410 |
| Caenorhabditis_elegans    | WNLNFGAIALMWRGGCIIRSRFLGDIHAFQKNKQLSNLLDDFFTKAITAQDSWRRV   | 411 |
| Drosophila_melanogaster   | WRLNYGGIALMWRGGCIIRSVFLGNIKDAYTSQPELSNLLDDFFKKAIERGQDSWREV | 408 |
| Yeast                     | WKLNNPAIALMWRGGCIIRSVFLAEITKAYRDPDENLLFNEFFASAVTKAQSGWRRV  | 412 |
|                           | * :: .:* : . ** * *: : * .** : * . : : .** .               |     |
| Human                     | STGVQAGIPMPCFTTALSFYDGYRHEMLPASLIQAQRDYFGAHTYELLAKP-----GQ | 463 |
| Rat                       | STGVQAGIPMPCFTTALSFYDGYRHEMLPANLIQAQRDYFGAHTYELLAKP-----GE | 463 |
| Mouse                     | STGVQAGIPMPCFTTALSFYDGYRHEMLPANLIQAQRDYFGAHTYELLAKP-----GE | 463 |
| Sheep                     | STGVQAGIPMPCFTTALSFYDGYRHEMLPANLIQAQRDYFGAHTYELLAKP-----GQ | 463 |
| Bovine                    | STGVQAGIPMPCFTTALSFYDGYRHEMLPANLIQAQRDYFGAHTYELLAKP-----GQ | 463 |
| Dog                       | STGVQAGIPMPCFTTALSFYDGYRHEMLPANLIQAQRDYFGAHTYELLAKP-----GQ | 463 |
| Pig                       | STGVQAGIPMPCFTTALSFYDGYRHEMLPANLIQAQRDYFGAHTYELLAKP-----GH | 455 |
| Giant_panda               | STGVQAGIPMPCFTTALSFYDGYRHEMLPANLIQAQRDYFGAHTYELLAKP-----GQ | 462 |
| Horse                     | STGVQAGIPMPCFTTALSFYDGYRHEMLPANLIQAQRDYFGAHTYELLAKP-----GQ | 463 |
| Atlantic_salmon           | SIGVQQGIPMPCFTTALSFYDGYRHEMLPANLLQAQRDYFGAHTYELLAKP-----GK | 463 |
| Osmerus_mordax            | STGVQQGIPMPCFTTALSFYDGYRHEMLPANLLQAQRDYFGAHTYELLAKP-----GT | 463 |
| Black_porgy               | STGVQQGIPMPCFTTALSFYDGYRHEMLPANLLQAQRDYFGAHTYELLAKP-----GH | 463 |
| Anthurium_amnicola        | AESAILGIPTPALSTALSFYDGYRHEMLPANLLQAQRDYFGAHTYELLAKP-----G  | 471 |
| Chlamydomonas_reinhardtii | ALSITHGVPIPSMTSSLYFDYTYRRLPANLVQAQRDFGSHYQRFDE-----G       | 467 |
| Zebrafish                 | STGVQQGIPMPCFTTALSFYDGYRHEMLPANLLQAQRDYFGAHTYELLAKP-----GT | 463 |
| Caenorhabditis_elegans    | CAAVRLGIPVPAFSSALAFYDGYTSEVVPANLLQAQRDYFGAHTYELLAKP-----GT | 464 |
| Drosophila_melanogaster   | ANAFRWGIPVPAFSSALAFYDGYTSEVVPANLLQAQRDYFGAHTYELLAKP-----GQ | 461 |
| Yeast                     | ALAATYGIPTPAFSSALAFYDGYRHEMLPANLLQAQRDYFGAHTYELLAKP-----GQ | 472 |
|                           | . . *:* * .:::* .:* * :**.*:*****:*:*:. : :                |     |
| Human                     | FIHTNWTGHGGSVSSS---SYNA                                    | 483 |
| Rat                       | FIHTNWTGHGGSVSSS---SYNA                                    | 483 |
| Mouse                     | FIHTNWTGHGGSVSSS---SYNA                                    | 483 |
| Sheep                     | FIHTNWTGHGGSVSSS---SYNA                                    | 483 |
| Bovine                    | FIHTNWTGHGGSVSSS---SYNA                                    | 483 |
| Dog                       | FIHTNWTGHGGSVSSS---SYNA                                    | 483 |
| Pig                       | FVHTNWTGHGGSVSSS---SYNA                                    | 475 |
| Giant_panda               | FIHTNWTGHGGSVSSS---SYNA                                    | 482 |
| Horse                     | FIHTNWTGHGGSVSSS---SYNA                                    | 483 |
| Atlantic_salmon           | YIHTNWTGHGGSVSSS---SYNA                                    | 483 |
| Osmerus_mordax            | HIHTNWTGHGGSVSSS---SYNA                                    | 483 |
| Black_porgy               | FIHTNWTGHGGSVSSS---SYNA                                    | 483 |
| Anthurium_amnicola        | DVHTNWTGHGGSVSSS---AYLA                                    | 491 |
| Chlamydomonas_reinhardtii | WYHTVWDETFGSADSIITSGYV                                     | 490 |
| Zebrafish                 | FIHTNWTGHGGSVSSS---SYNA                                    | 483 |
| Caenorhabditis_elegans    | WVHTNWTGTGGRVTSN---AYNA                                    | 484 |
| Drosophila_melanogaster   | FHHTNWTGTGGSVSSS---TYQA                                    | 481 |
| Yeast                     | DIHTNWTGHGGSVSSS---TYQA                                    | 492 |
|                           | * * * : * .                                                |     |

**Supplementary Fig. 1, related to Fig. 1**

**a,** The peptides cover 92.55% of 6PGD sequences, and 6PGD pY481 was the only phosphorylation site detected in 6PGD (top panel). The presence of the  $b_{33}^{3+}$  at 1183.22704 and the  $b_{34}^{3+}$  at 1264.23692 indicates that the Y481 residue is phosphorylation modified (bottom panel).

**b,** GSC11 cells stably expressing Flag-6PGD WT or Y481F were treated with or without EGF (100 ng·ml<sup>-1</sup>) for 30 min.

**c,** GSC11 cells stably expressing Flag-6PGD WT or Y481F were treated with EGF (100 ng·ml<sup>-1</sup>) for 30 min.

**d,** Sequence alignment of full length 6PGD among indicated species.

**e-h,** Flag-6PGD WT or Y481F were immunoprecipitated from U251/EGFR cells or GSC11 cells with or without EGF (100 ng·ml<sup>-1</sup>) treatment for 30 min. The enzymatic activities of immunoprecipitated Flag-6PGD proteins were examined (**e, g**). Statistical analyses of 6PGD activities (**f, h**). The activity of 6PGD was normalized against protein amounts. 6PGD WT activity without EGF treatment was normalized to 1.0. Data represent the mean ± SD of normalized 6PGD activities. Student's t test (unpaired, two-tailed), \*\*p<0.01; n.s.: not significant

Immunoprecipitation and immunoblotting analyses were performed with the indicated antibodies. Data are representative of at least three independent experiments. (**b, c, f, h**) Source data are provided as a Source Data file.

Supplementary Fig. 2

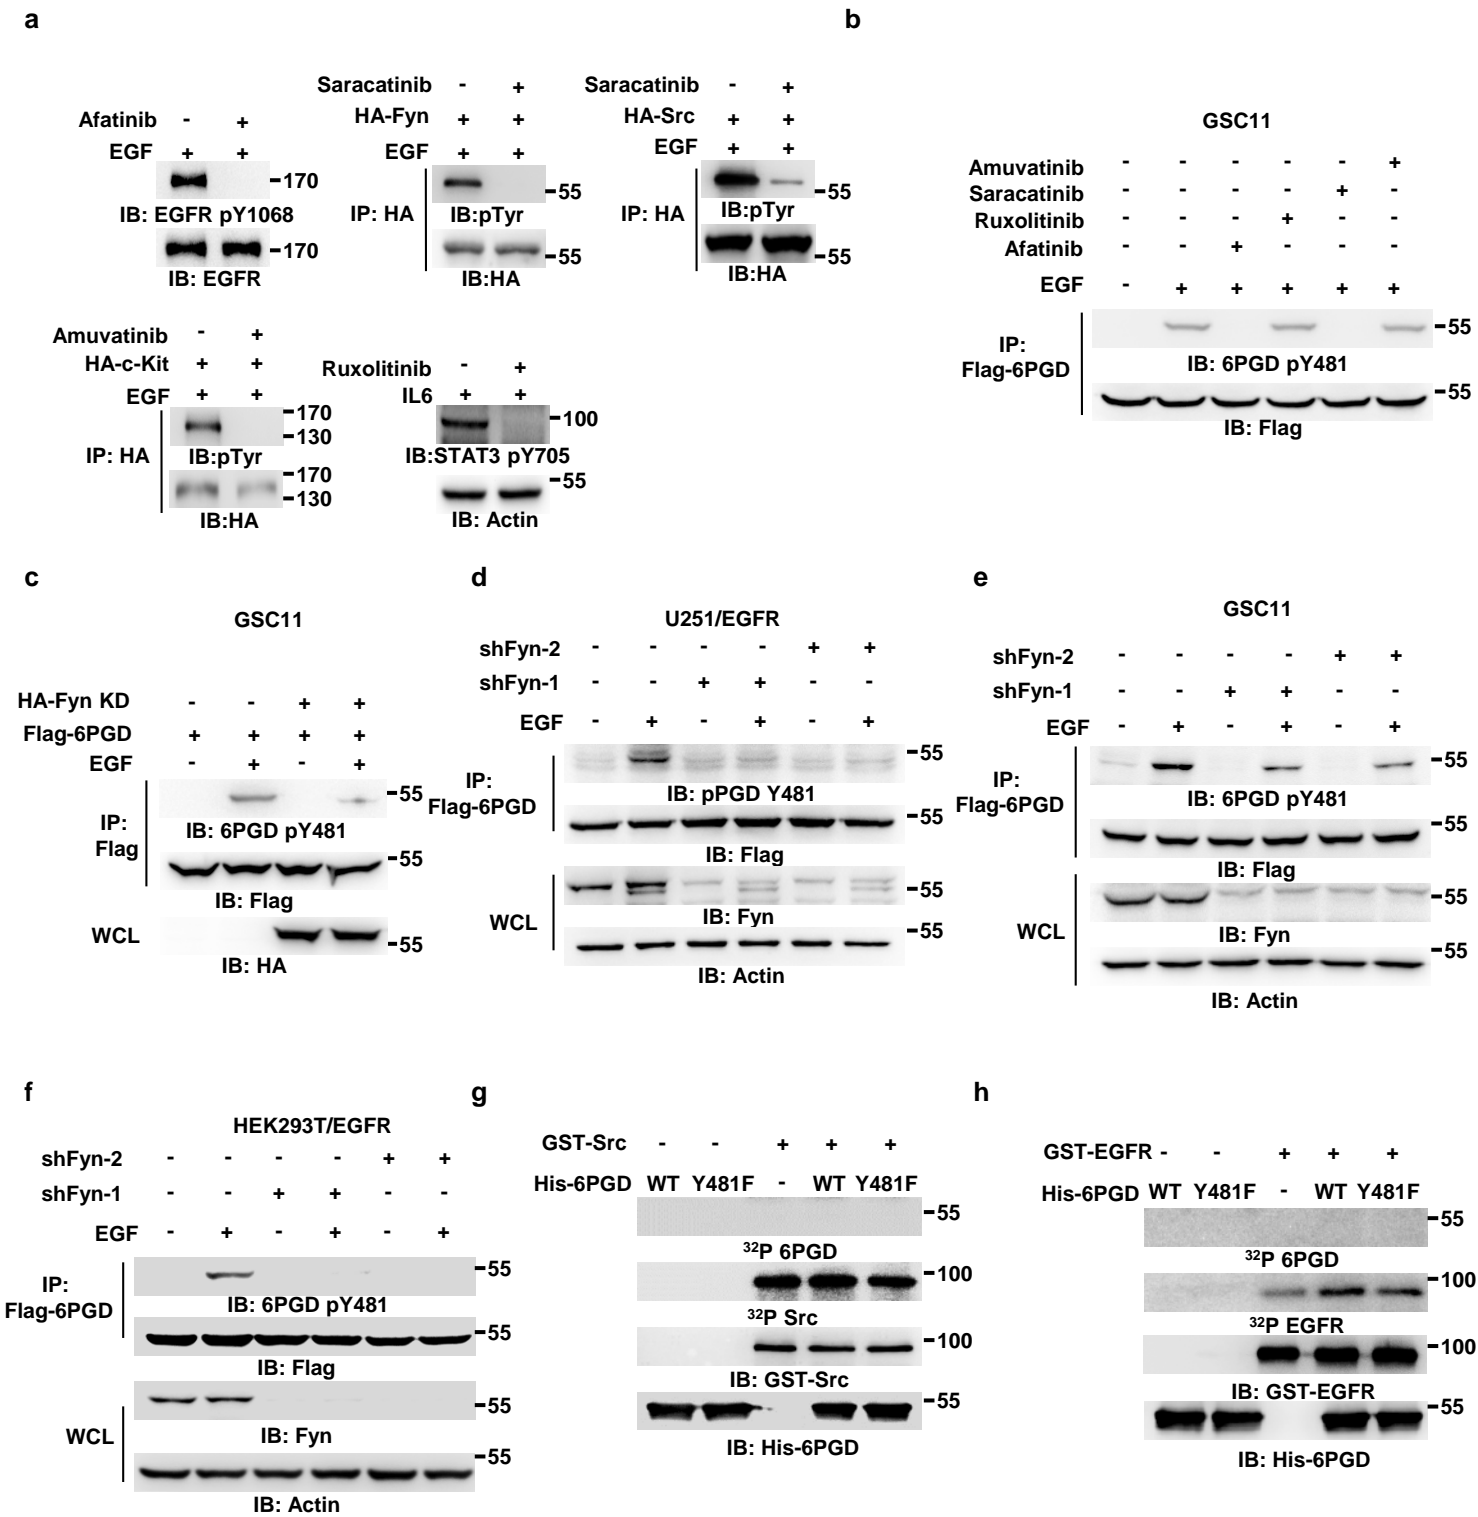

**Supplementary Fig. 2, related to Fig. 2**

**a**, HEK293T/EGFR cells were transfected with HA-Src, HA-Fyn or HA-c-Kit and then pretreated with EGFR inhibitor Afatinib (1  $\mu$ M), Src family kinases inhibitor Saracatinib (1  $\mu$ M) or c-Kit kinase inhibitor Amuvatinib (10  $\mu$ M) for 3 hrs, followed by EGF treatment (100 ng·ml<sup>-1</sup>) for 30 min. U87 cells were pretreated with or without Ruxolitinib (1  $\mu$ M) for 3 hrs, followed by the treatment of IL6 for 1 hr.

**b**, GSC11 cells stably expressing Flag-6PGD were pretreated with Afatinib (1  $\mu$ M), Ruxolitinib (1  $\mu$ M), Saracatinib (1  $\mu$ M) or Amuvatinib (10  $\mu$ M) for 3 hrs and then treated with EGF (100 ng·ml<sup>-1</sup>) for 30 min.

**c**, GSC11 cells stably expressing Flag-6PGD were infected with or without the lentivirus expressing a kinase-dead HA-Fyn (KD). These cells were then treated with or without EGF (100 ng·ml<sup>-1</sup>) for 30 min.

**d-f**, U251/EGFR cells (**d**), GSC11 cells (**e**) or HEK293T/EGFR cells (**f**) were infected with or without the lentivirus expressing shNT or two shRNA sequences against Fyn (shFyn-1 and shFyn-2). These cells were then treated with or without EGF (100 ng·ml<sup>-1</sup>) for 30 min as indicated.

**g,h**, *In vitro* kinase assays were carried out with purified recombinant His-6PGD WT or Y481F and commercial purchased recombinant GST-EGFR (**g**) or GST-Src (**h**).

Immunoprecipitation and immunoblotting analyses were performed with the indicated antibodies. Data are representative of at least three independent experiments. Source data are provided as a Source Data file.

Supplementary Fig. 3

a

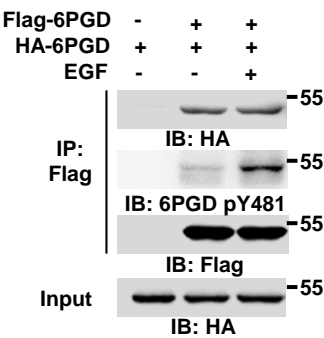

b

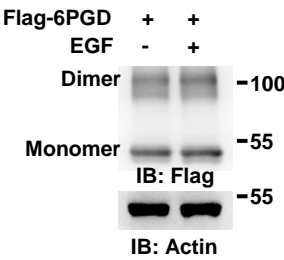

c

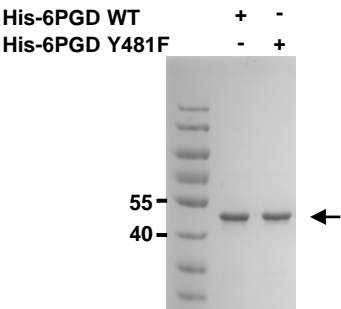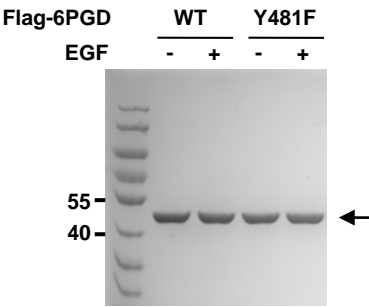

d

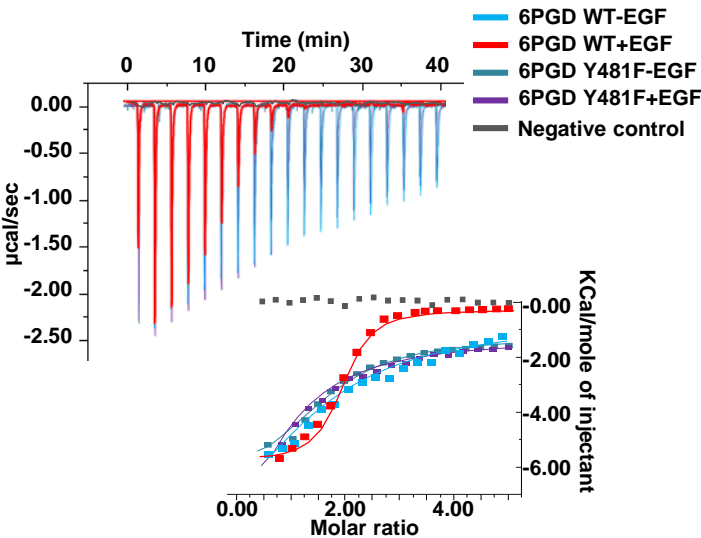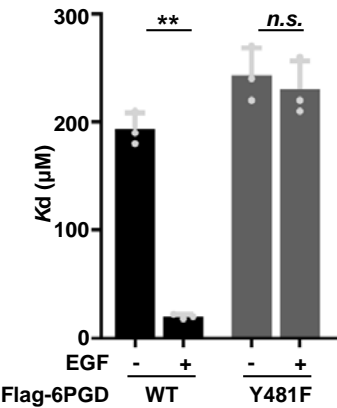

e

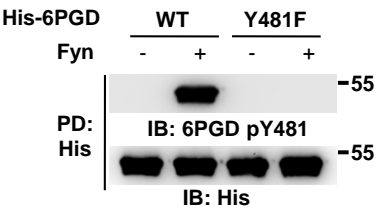

**Supplementary Fig. 3, related to Fig. 3**

**a,** U87/EGFR cells were transiently transfected with Flag-6PGD and HA-6PGD. The cells were treated with or without EGF ( $100 \text{ ng} \cdot \text{ml}^{-1}$ ) for 30 min.

**b,** U87/EGFR cells stably expressing Flag-6PGD were treated with or without EGF ( $100 \text{ ng} \cdot \text{ml}^{-1}$ ) for 30 min. Cell lysates were mixed with glutaraldehyde to the final concentration of 0.025% for 15 min.

**c,** The purities of bacterial purified recombinant His-6PGD WT and Y481F were verified by Coomassie blue staining (top panel). HEK293T/EGFR cells transfected with 6PGD WT and Y481F were treated with or without EGF ( $100 \text{ ng} \cdot \text{ml}^{-1}$ ) for 30 min. The purities of immunoprecipitated 6PGD variants were verified by Coomassie blue staining (bottom panel).

**d,** HEK293T/EGFR cells transfected with 6PGD WT or Y481F were treated with or without EGF ( $100 \text{ ng} \cdot \text{ml}^{-1}$ ) for 30 min. ITC assays were performed with immunoprecipitated 6PGD variants ( $0.05 \text{ mM}$ ) and  $\text{NADP}^+$  ( $1 \text{ mM}$ ) (top panel). Flag peptides were used as negative control. Statistical analyses of  $K_d$  values of 6PGD variants for  $\text{NADP}^+$  were presented (bottom panel). Data represent the mean  $\pm$  SD of three independent experiments. Student's t test (unpaired, two-tailed),  $**p < 0.01$ ; n.s.: not significant

**e,** *In vitro* kinase assays were performed by incubating bacterial purified recombinant His-6PGD WT or Y481F with or without active recombinant Fyn.

Immunoprecipitation and immunoblotting analyses were performed with the indicated antibodies. Data are representative of at least three independent experiments. Source data are provided as a Source Data file.

Supplementary Fig. 4

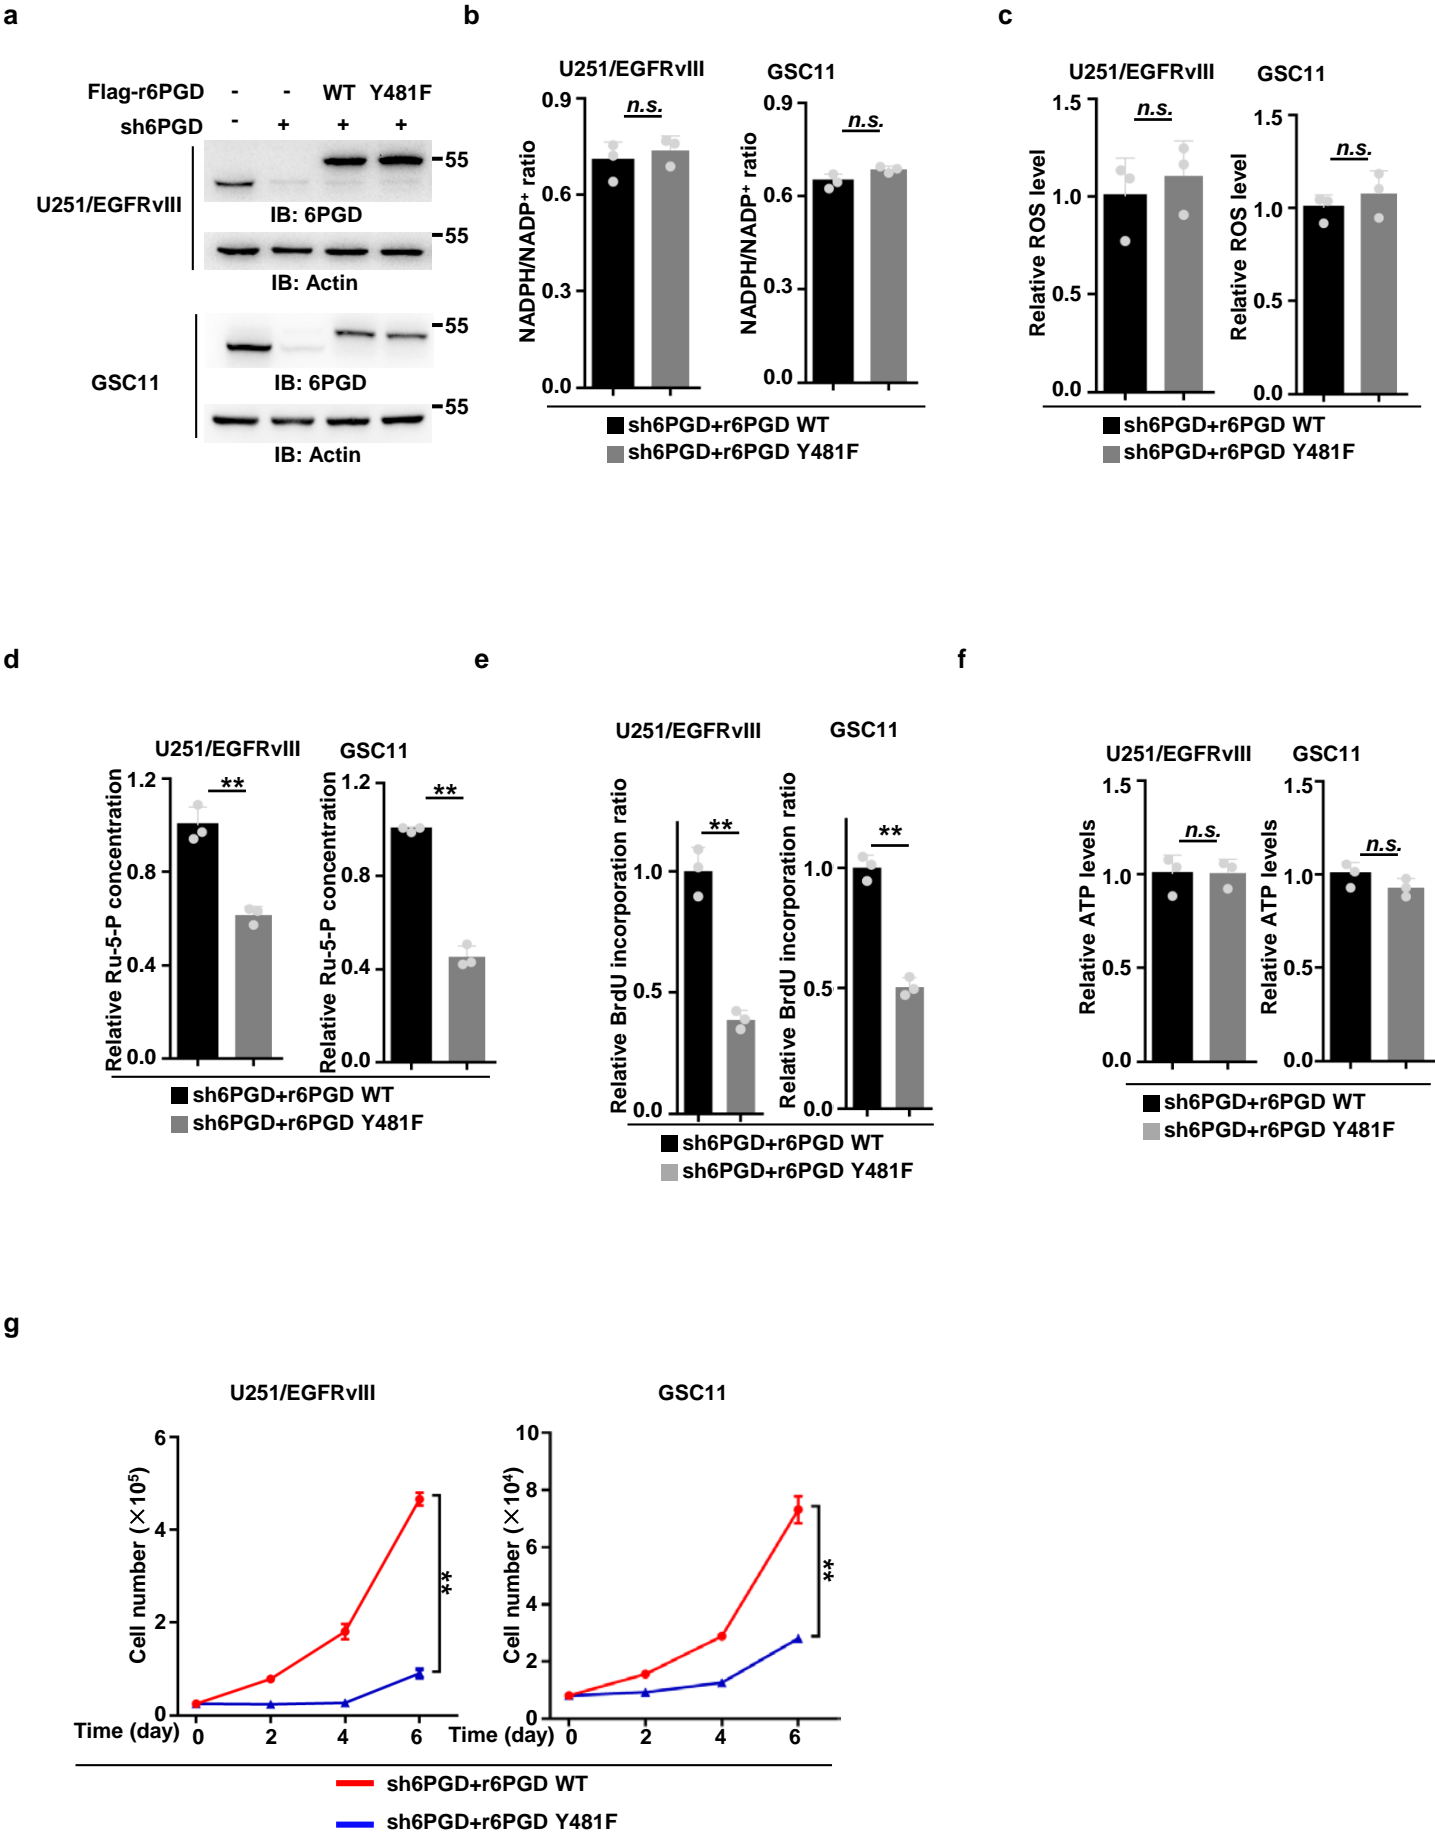

**Supplementary Fig. 4, related to Fig. 4**

**a**, U251/EGFRvIII cells or GSC11 cells stably expressing luciferase were depleted of endogenous 6PGD and reconstituted with the expression of r6PGD WT or Y481F. The expression of 6PGD was examined using immunoblotting assays. Data are representative of at least three independent experiments.

**b-f**, NADP<sup>+</sup>/NADPH ratio (**b**), ROS levels (**c**), cellular Ru-5-P level (**d**), BrdU incorporation ratio (**e**) and cellular ATP level (**f**) were measured in these cells generated in (**a**).

**g**, Cell proliferation was determined in these cells generated in (**a**).

**(b-g)** Data represent the mean  $\pm$  SD of three independent experiments. Student's t test (unpaired, two-tailed),

**\*\***p<0.01; n.s.: not significant. Source data are provided as a Source Data file.

Supplementary Fig. 5

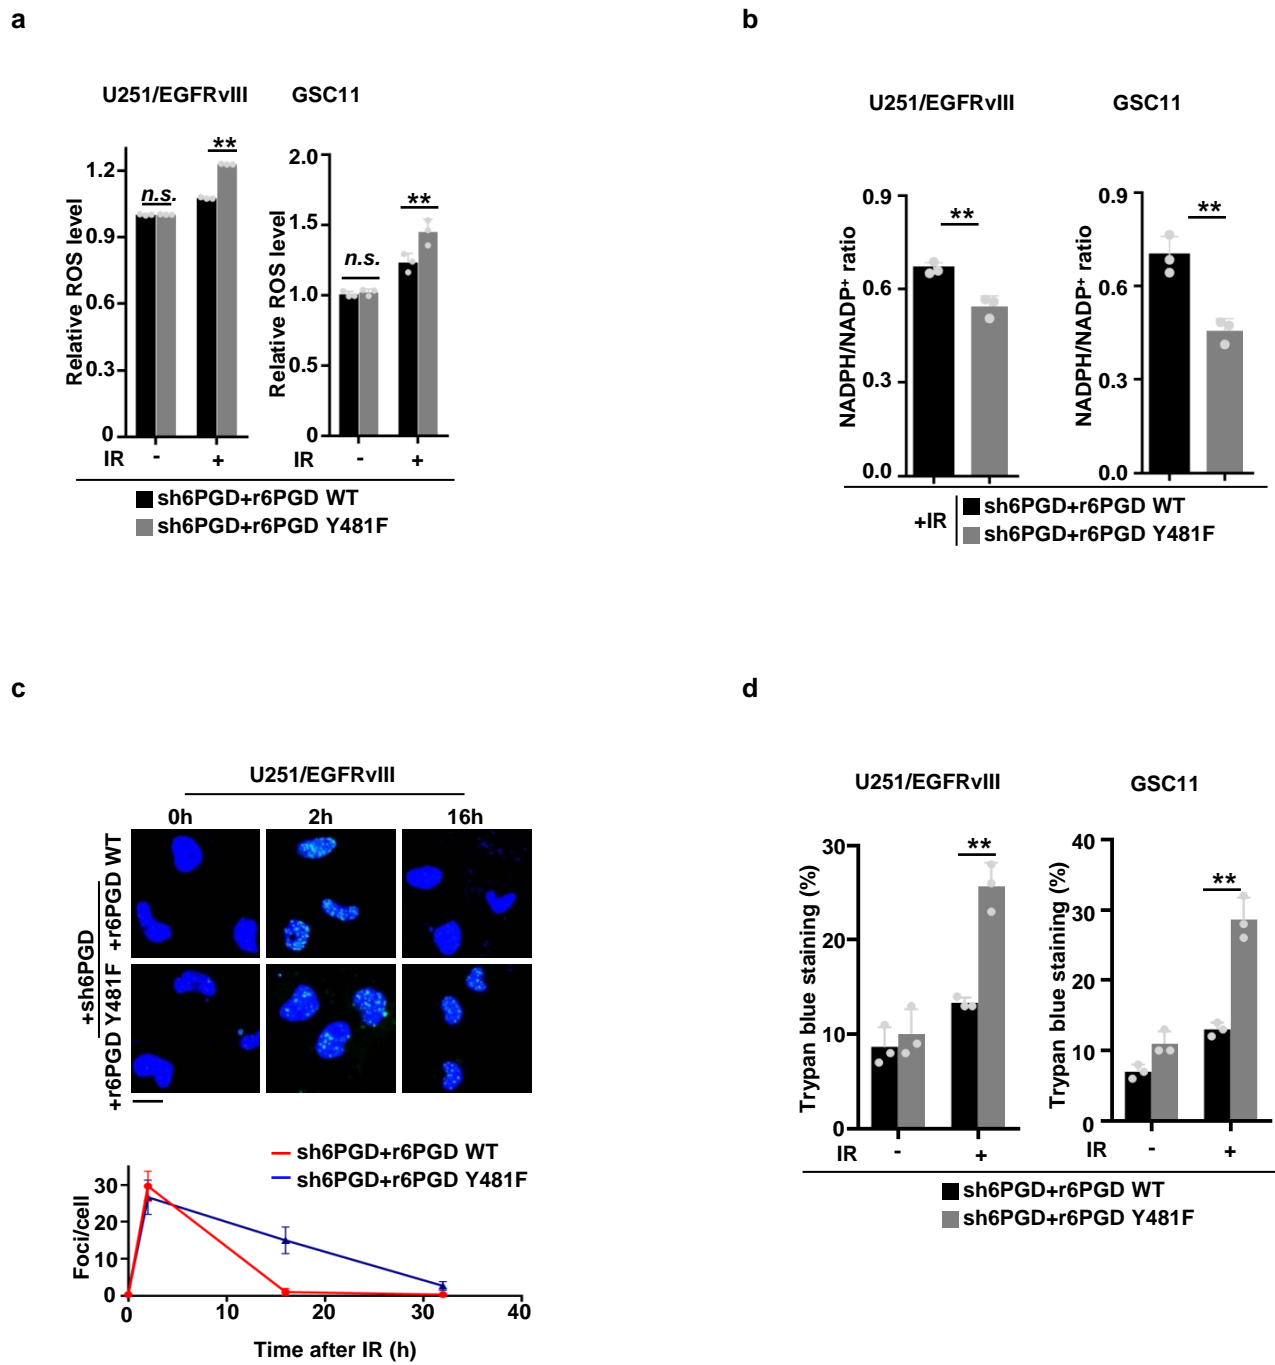

**Supplementary Fig. 5, related to Fig. 5**

**a,b**, U251/EGFRvIII cells or GSC11 cells stably expressing luciferase were depleted of endogenous 6PGD and reconstituted with the expression of r6PGD WT or Y481F. These cells were treated with or without X-ray radiation (10 Gy) and cultured for 8 hrs. ROS levels were measured using ROS assay kit (**a**). NADPH/NADP<sup>+</sup> ratio were determined using NADP<sup>+</sup>/NADPH quantitation kit (**b**).

**c**, These genetically-modified U251/EGFRvIII cells generated in (**a**) were subjected to X-ray radiation (2 Gy) and cultured for indicated times. Immunofluorescence staining was performed using anti- $\gamma$ H2AX antibody.

Scale bar, 20  $\mu$ m

**d**, These cells generated in (**a**) were subjected to X-ray radiation (10 Gy) and cultured for 48 hrs. Cell death was determined using trypan blue staining.

Data represent the mean  $\pm$  SD of three independent experiments. Student's t test (unpaired, two-tailed),

\*\*p<0.01; n.s.: not significant. Source data are provided as a Source Data file.

Supplementary Fig. 6

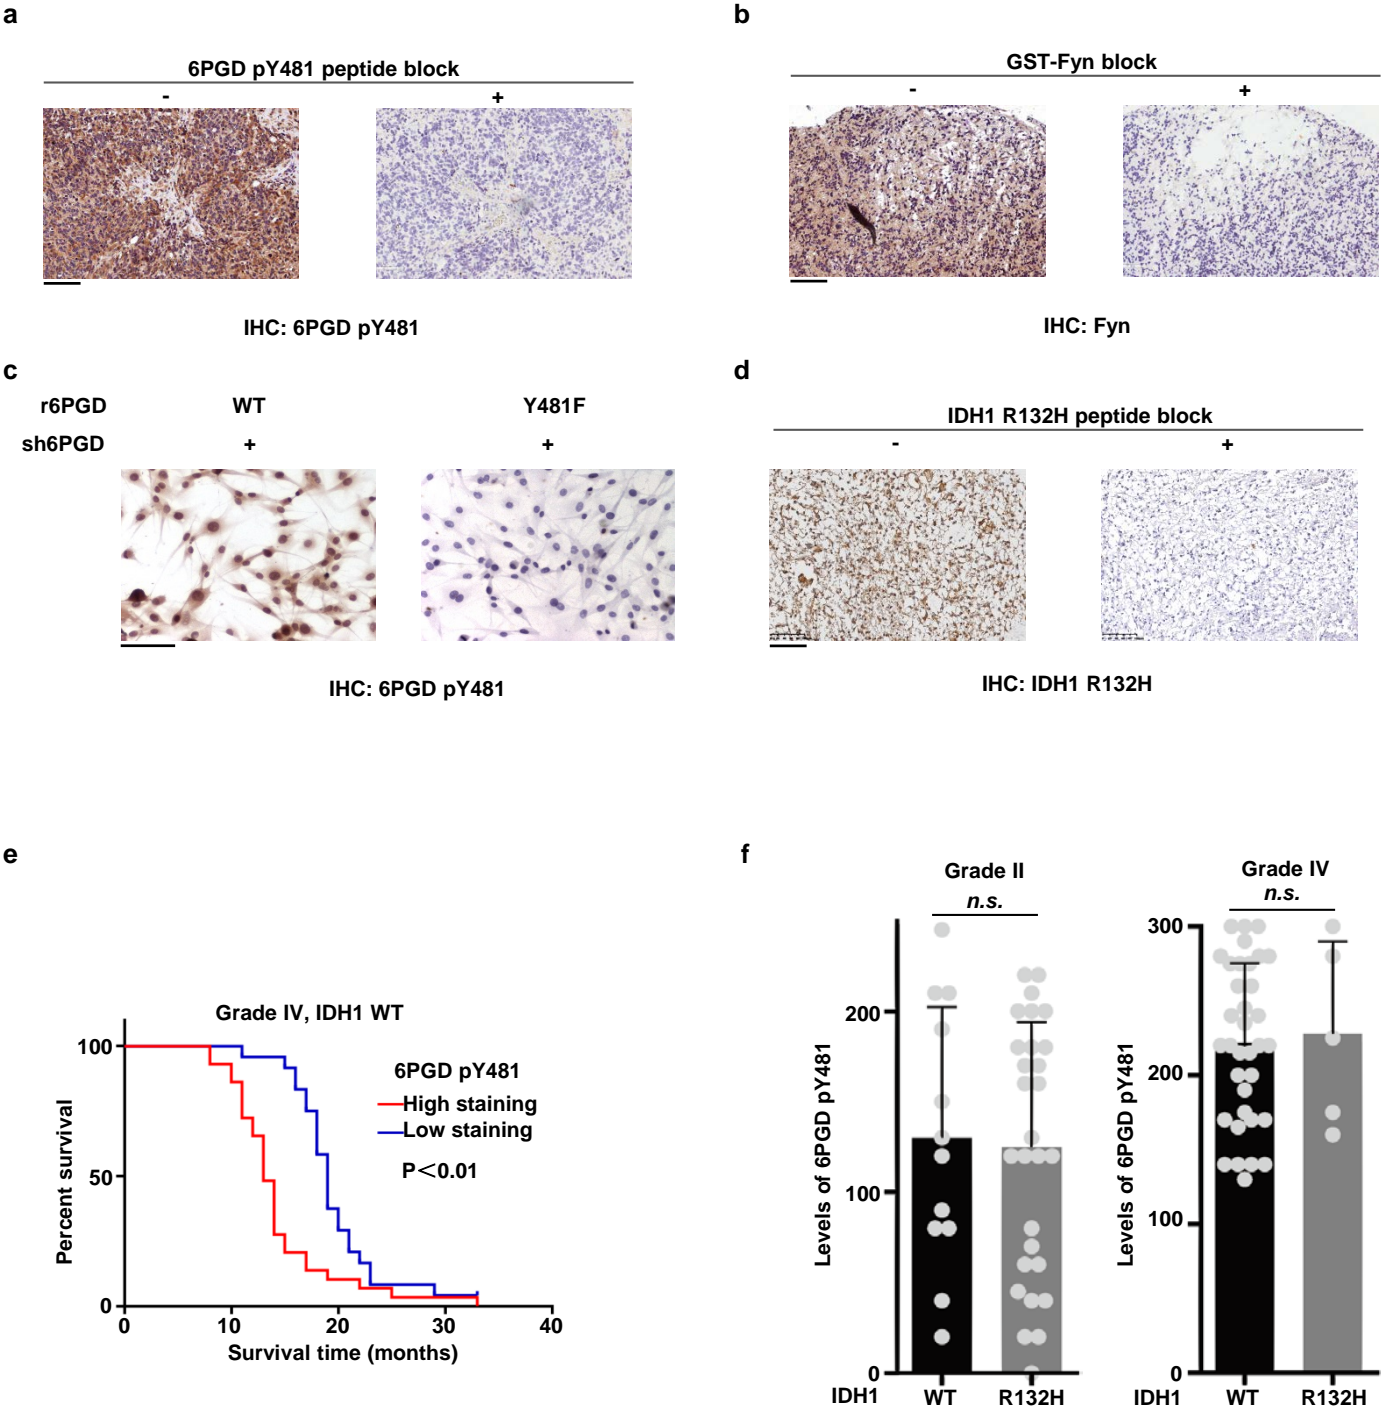

**Supplementary Fig. 6, related to Fig. 6**

**a,b,** Validation of the specificities of anti-6PGD pY481 or anti-Fyn antibody. IHC analyses of 6PGD pY481 or Fyn were performed in human GBM tissues with the indicated antibodies in the presence or absence of specific blocking peptides or proteins. Scale bar, 100  $\mu$ m

**c,** Validation of the specificity of anti-6PGD pY481 antibody. IHC analyses of 6PGD pY481 were performed in endogenous 6PGD-depleted U87/EGFRvIII cells with rescued expression of r6PGD WT or Y481F. Scale bar, 100  $\mu$ m

**d,** Validation of the specificity of anti-IDH1 R132H antibody. IHC analyses of IDH1 R132H were performed in human GBM tissues with this antibody in the presence or absence of specific blocking peptides. Scale bar, 100  $\mu$ m

**e,** Survival durations of 53 GBM (IDH WT) patients with low (0-170 staining scores, blue curve) versus high (175-300 staining scores, red curve) 6PGD pY481 levels (low, 23 patients; high, 30 patients) were compared. Landmark represents censored (alive at last clinical follow-up) patients. Log-rank test,  $p < 0.01$ .

**f,** IHC analyses of 6PGD pY481 or IDH1 R132H was performed in 40 diffuse astrocytoma (WHO grade II) specimens and 40 GBM (WHO grade IV) specimens using anti-6PGD pY481 and anti-IDH1 R132H antibody. IHC scores of 6PGD pY481 were compared between the low grade glioma patients with IDH1 WT (n=12) and the low grade glioma patients with IDH1 R132H (n=28) (left panel) or between the high grade GBM patients with IDH1 WT (n=35) and the high grade GBM patients with IDH1 R132H (n=5). Student's t-test (unpaired, two tailed), n.s.: not significant.

**(e, f)** Source data are provided as a Source Data file.

**Supplementary Table 1.** Parameters for LC/MS/MS analysis

| <b>Compounds</b>        | <b>Transition (m/z)</b> | <b>DP (V)</b> | <b>CE (eV)</b> | <b>Retention Time (min)</b> |
|-------------------------|-------------------------|---------------|----------------|-----------------------------|
| G-6-P/F-6-P-m0, ..., m6 | 259>97, ..., 265>97     | -50           | -22            | 9.83                        |
| R-5-P-m0, ..., m5       | 229>97, ..., 234>97     | -80           | -19            | 9.73                        |
| Ru-5-P-m0, ..., m5      | 229>97, ..., 234>97     | -80           | -19            | 9.74                        |
| S-7-P-m0, ..., m7       | 289>97, ..., 296>97     | -80           | -20            | 10.22                       |
| glucose-m0, ..., m6     | 239>179, ..., 245>185   | -50           | -11            | 6.75                        |
